# Supplementary material for: Vitamin D Nutritional Status and Its Related Factors for Chinese Children and Adolescents in 2010–2012
Source: MDPI journal article supplement (doi:10.3390/nu9091024), 2017-09-15
Supplement: s1 [file s1]

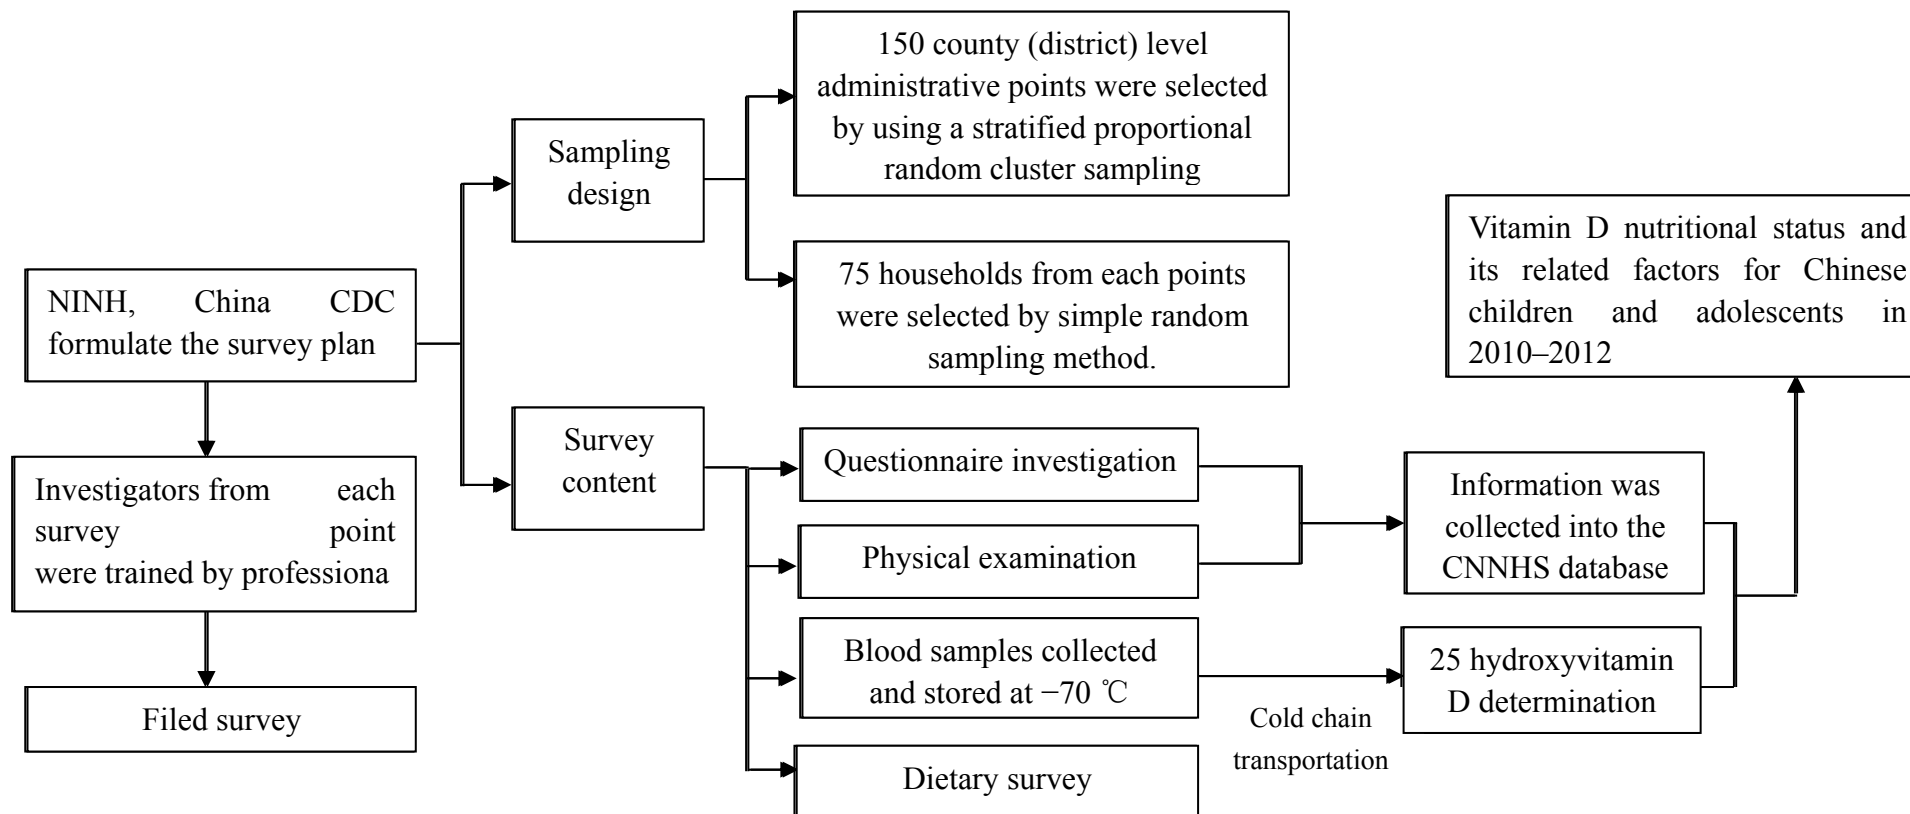

**Figure S1.** Flow chart for the study of vitamin D nutritional status and its related factors for Chinese children and adolescents in 2010–2012.
